# Supplementary material for: Aegilops tauschii draft genome sequence reveals a gene repertoire for wheat adaptation
Source: Springer Nature journal article supplement (doi:10.1038/nature12028), 2013-03-22

Supplementary Figure 14: Anchoring of *Ae. tauschii* scaffolds to three SSR-based genetic maps.

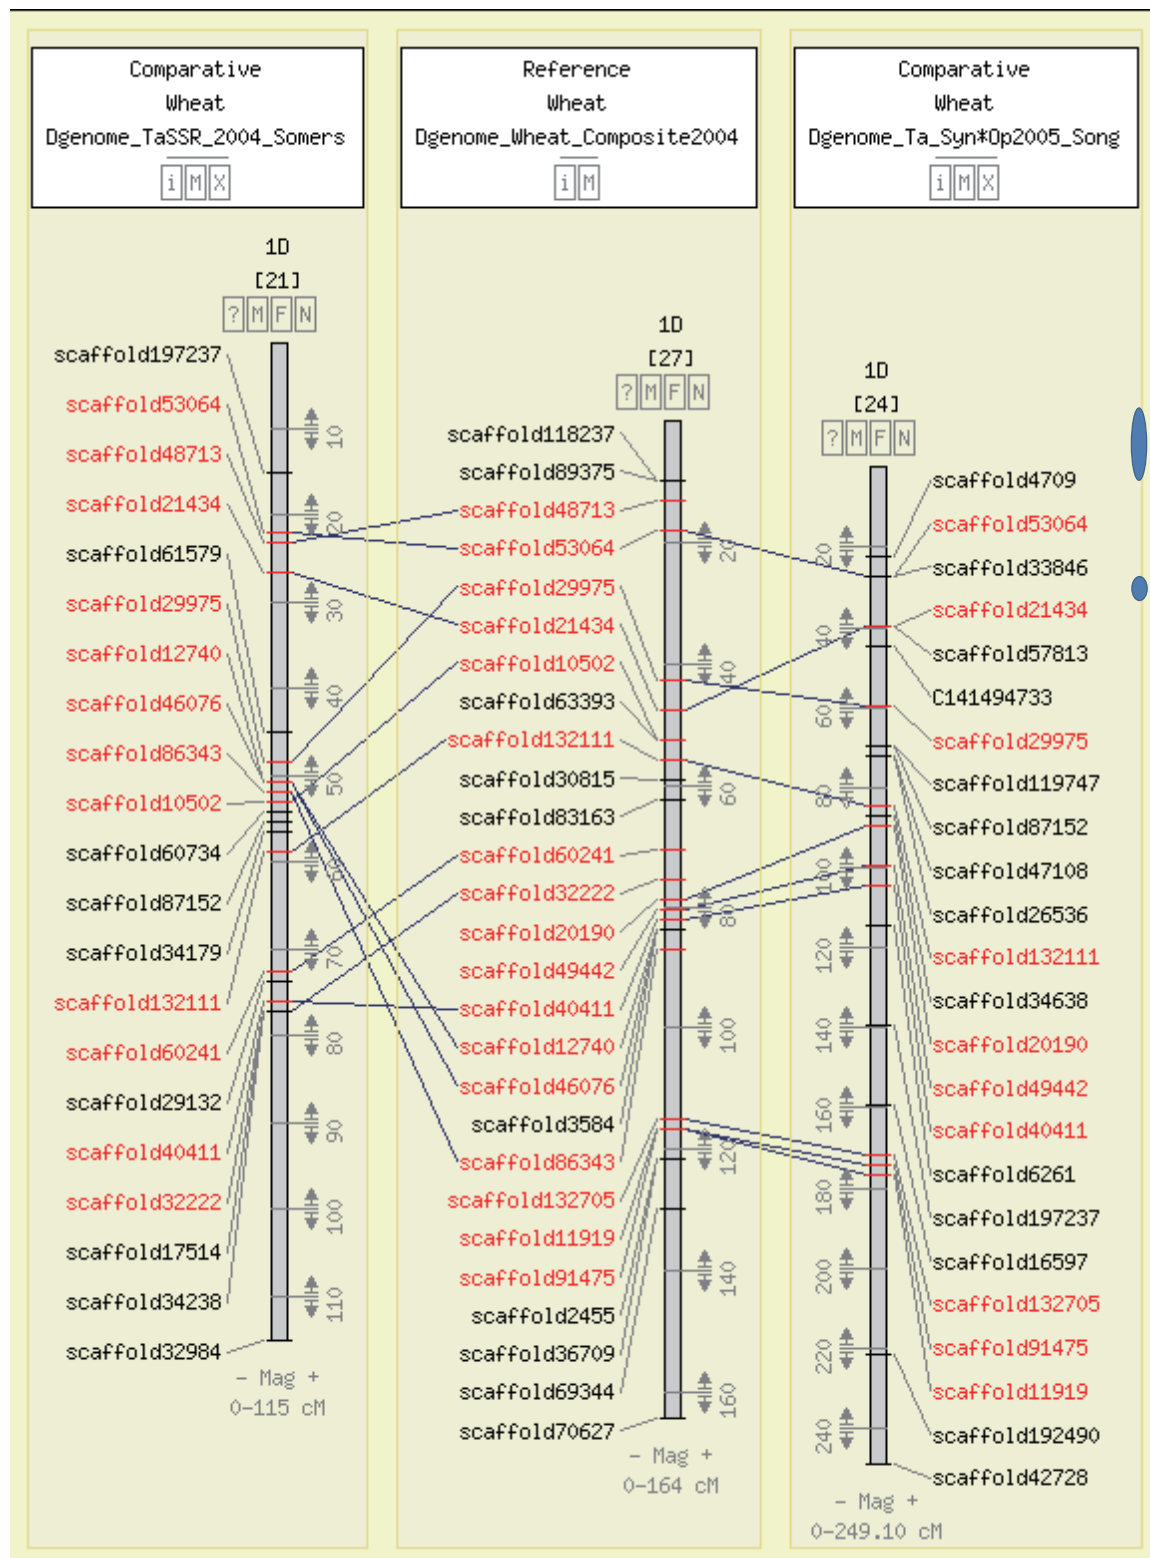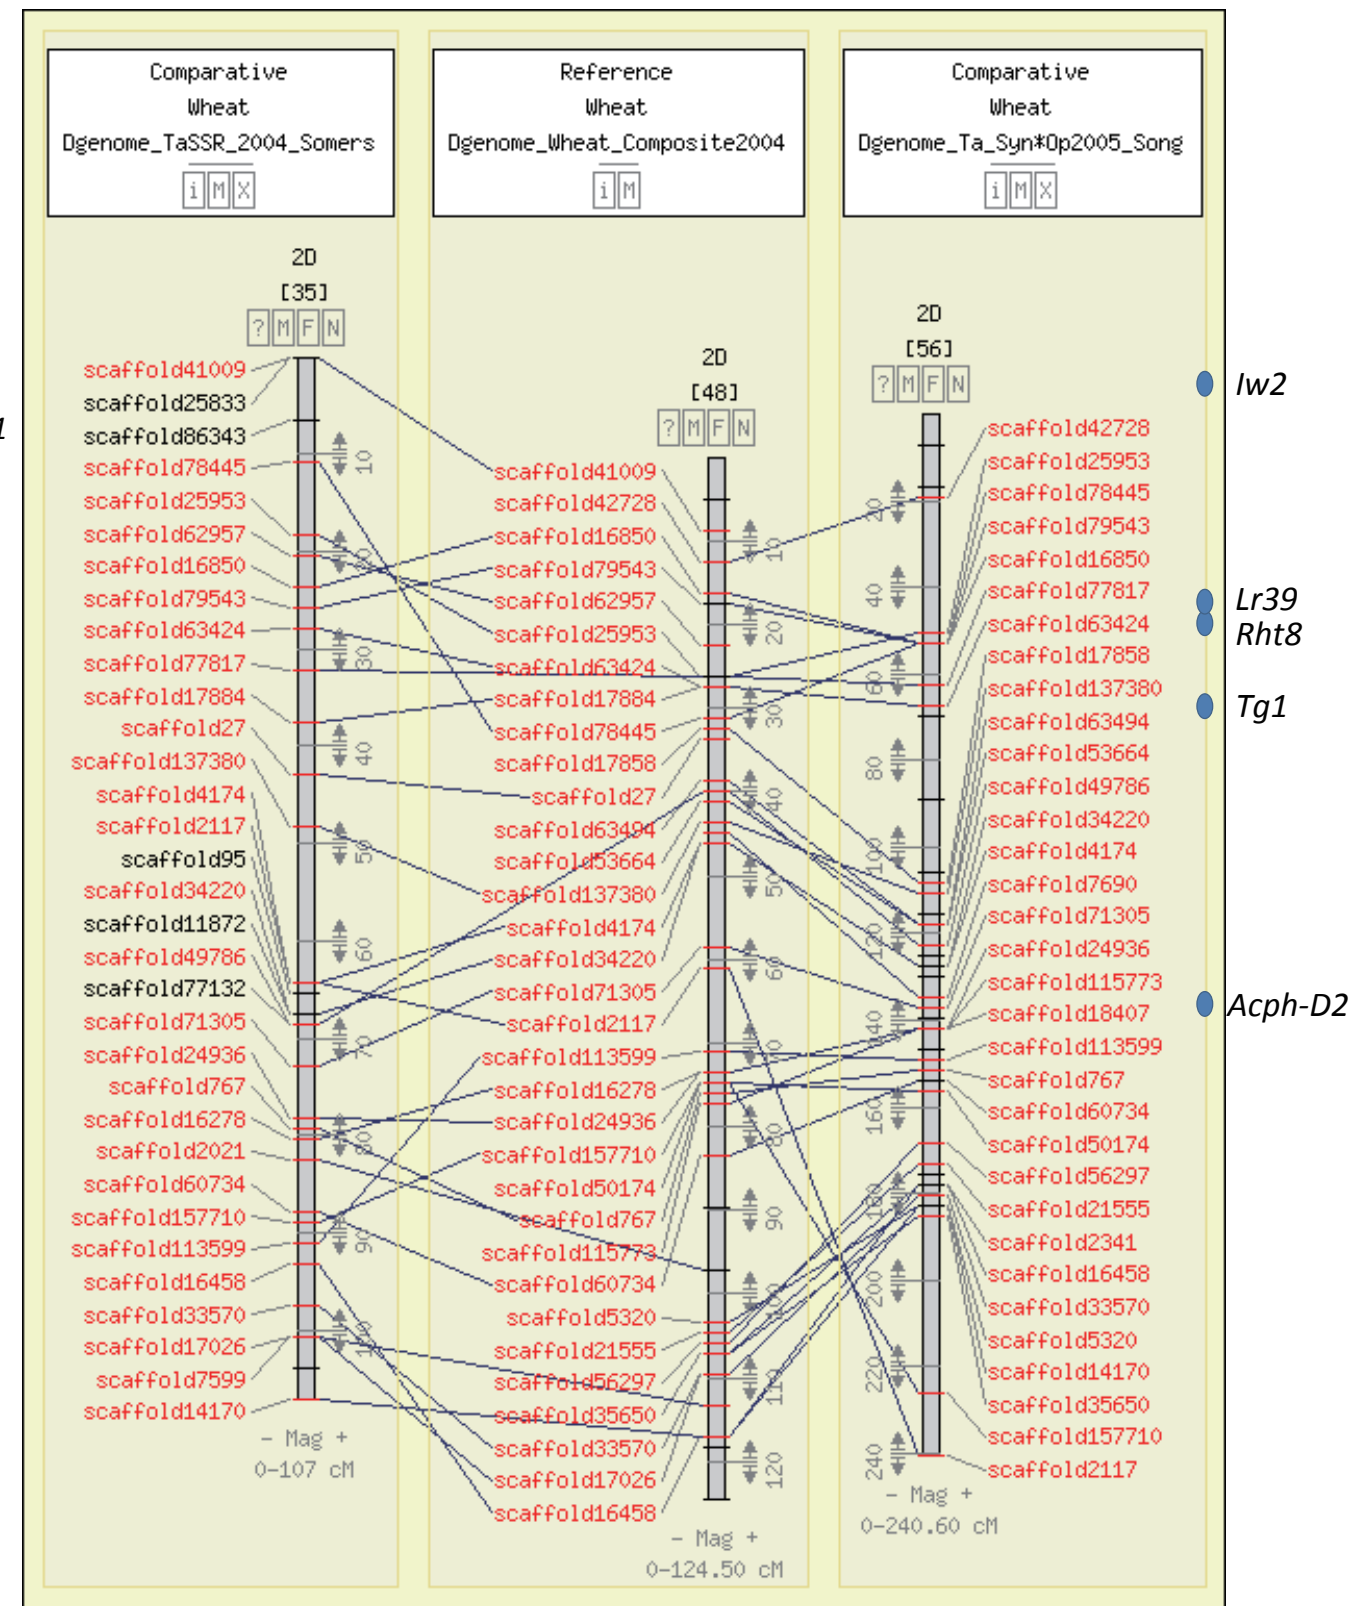

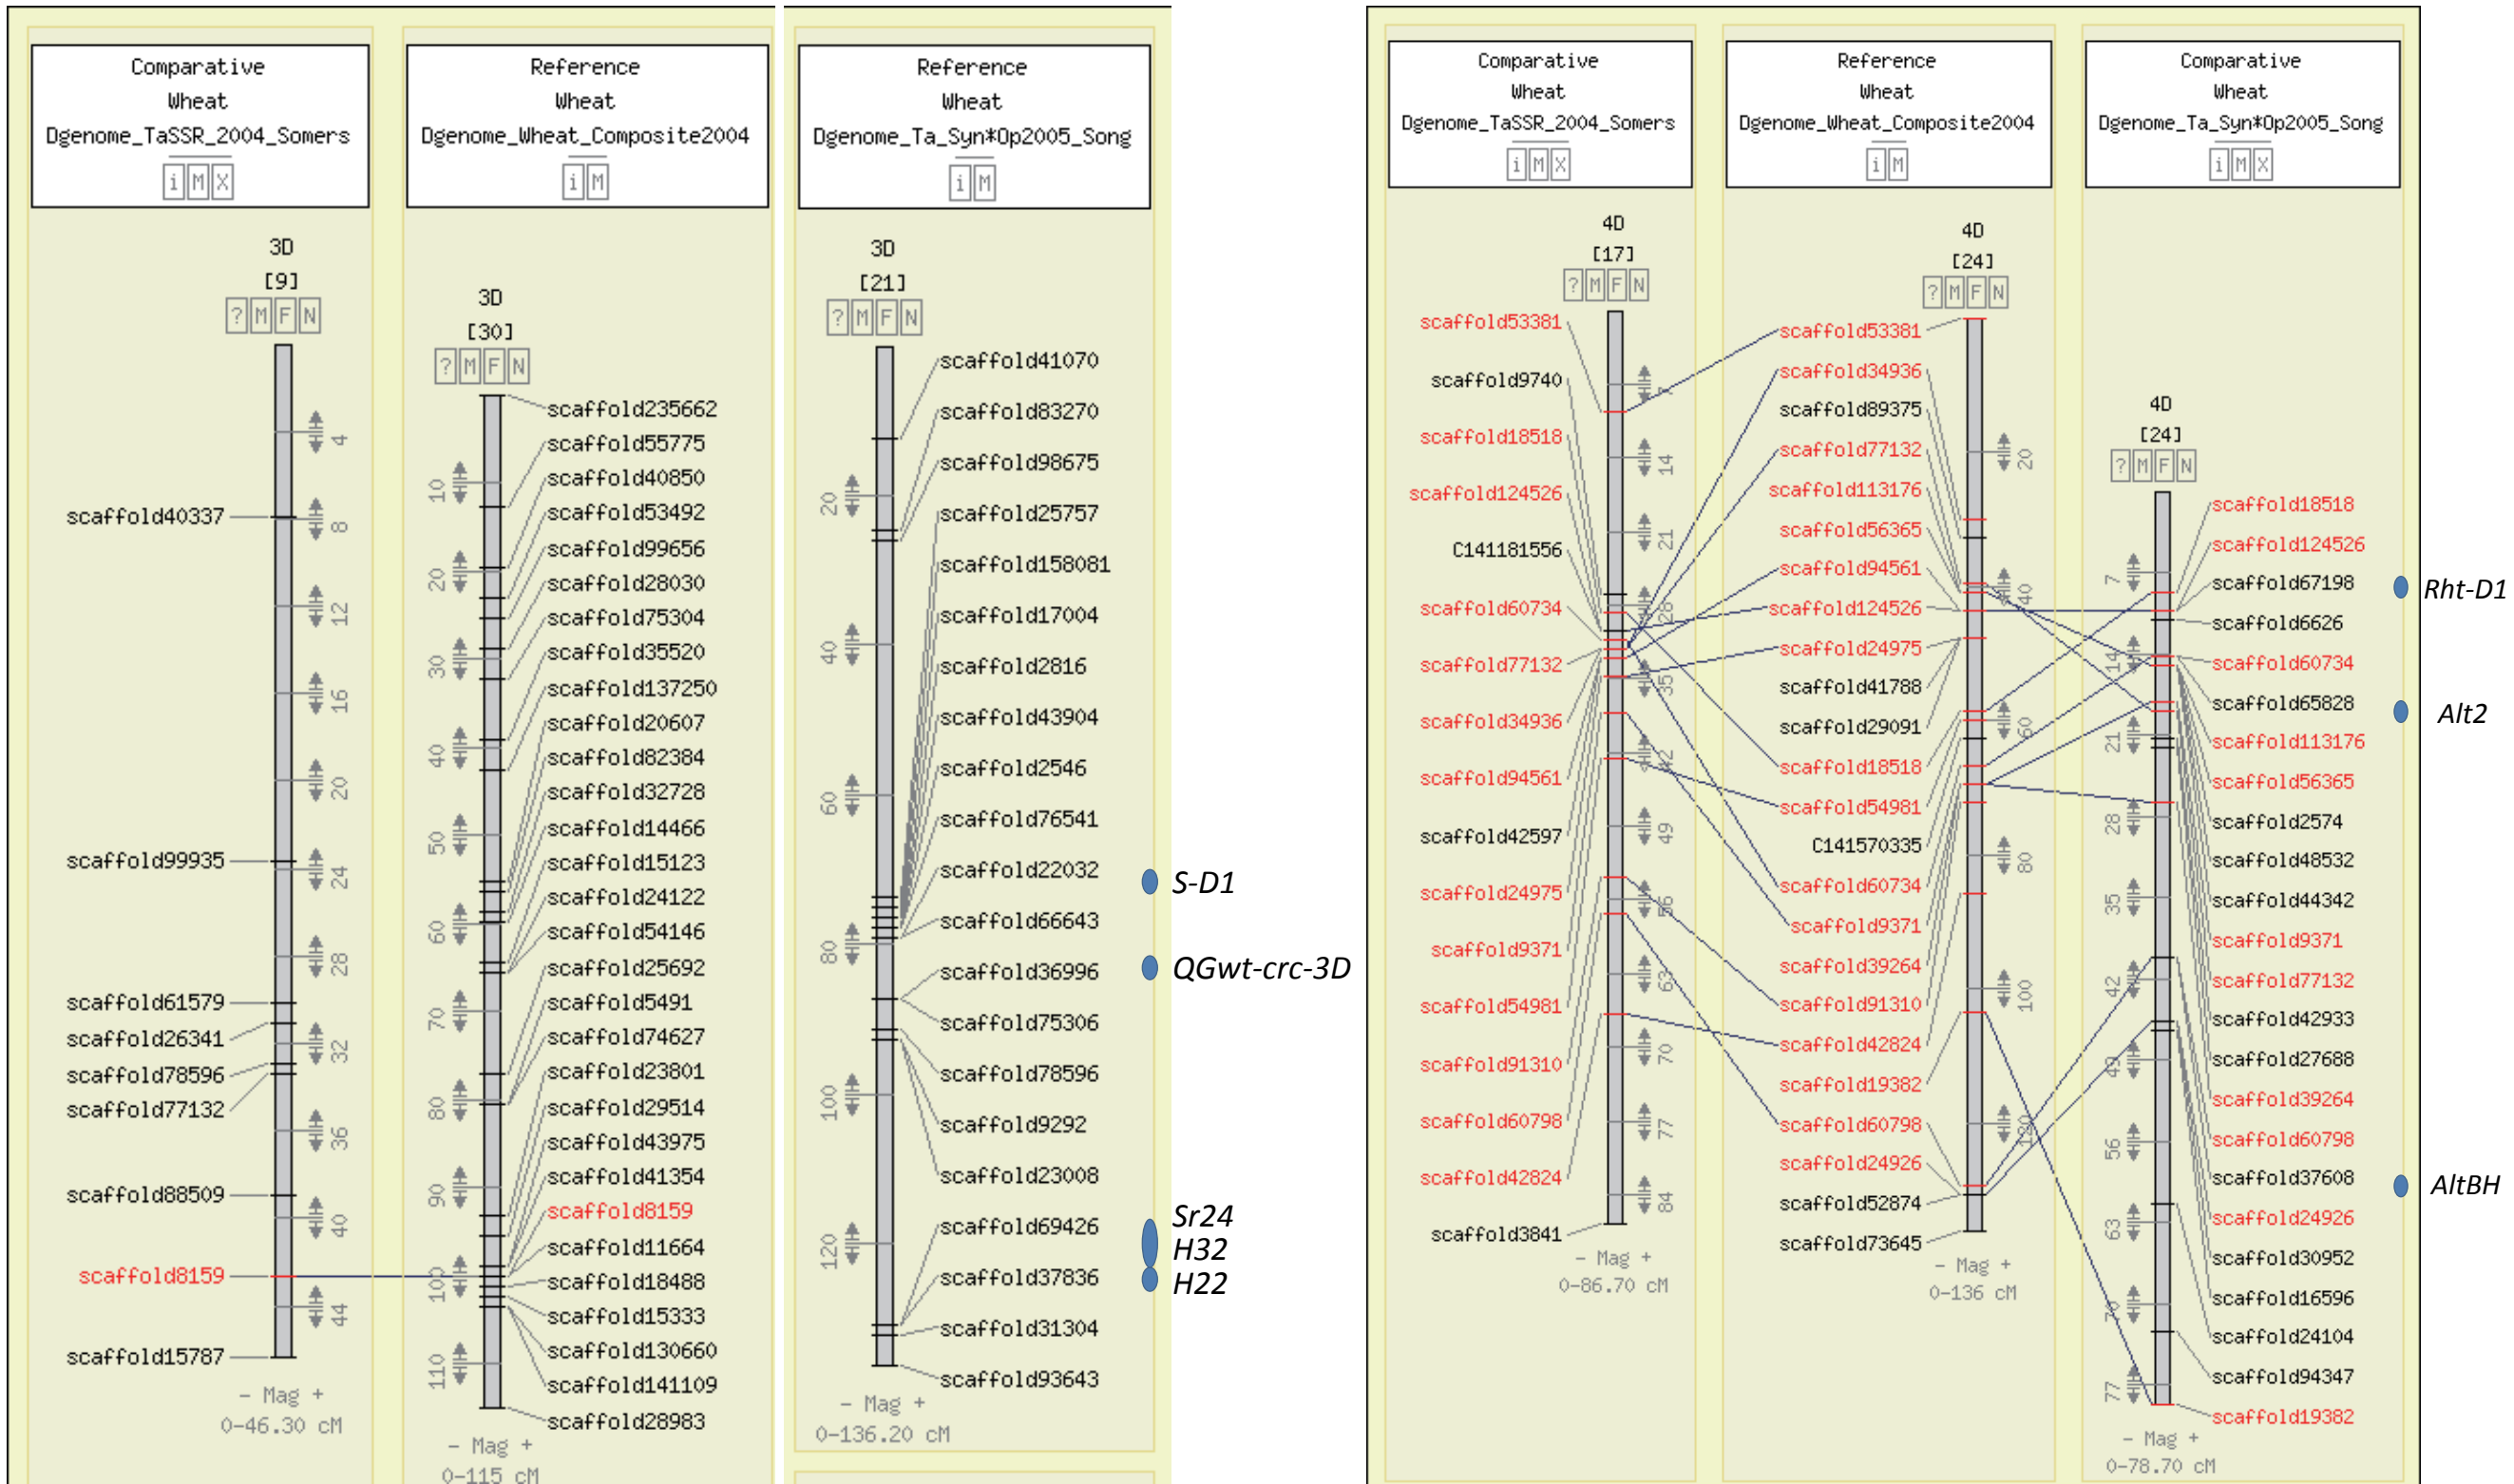

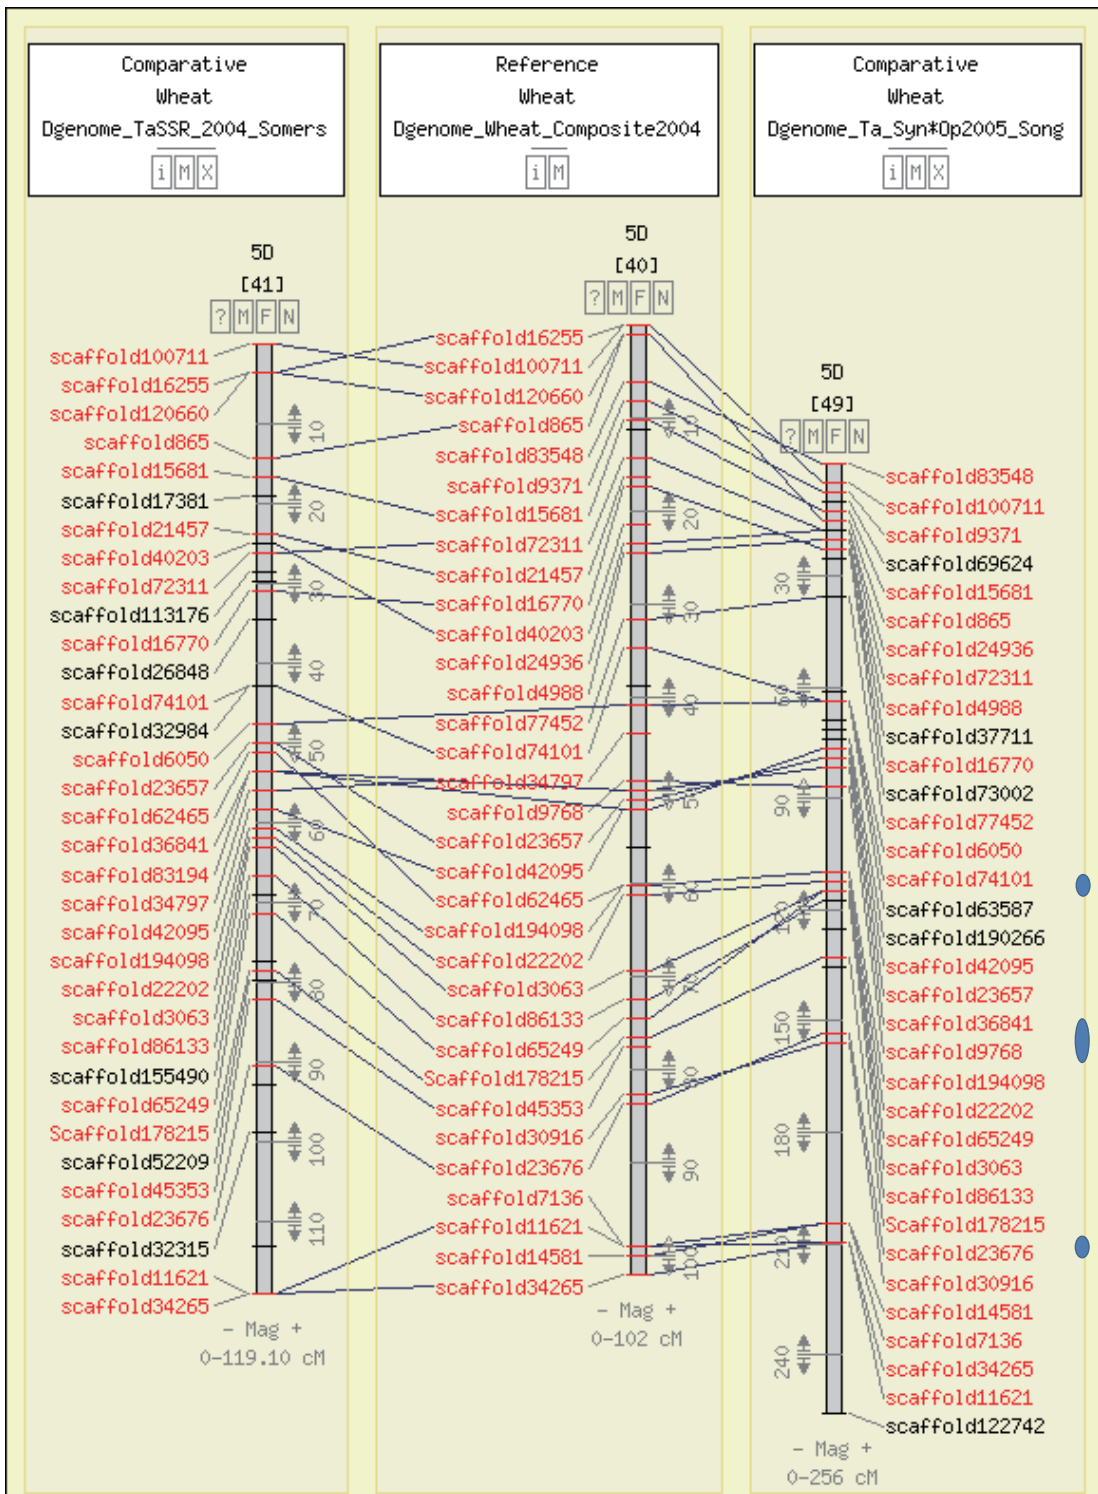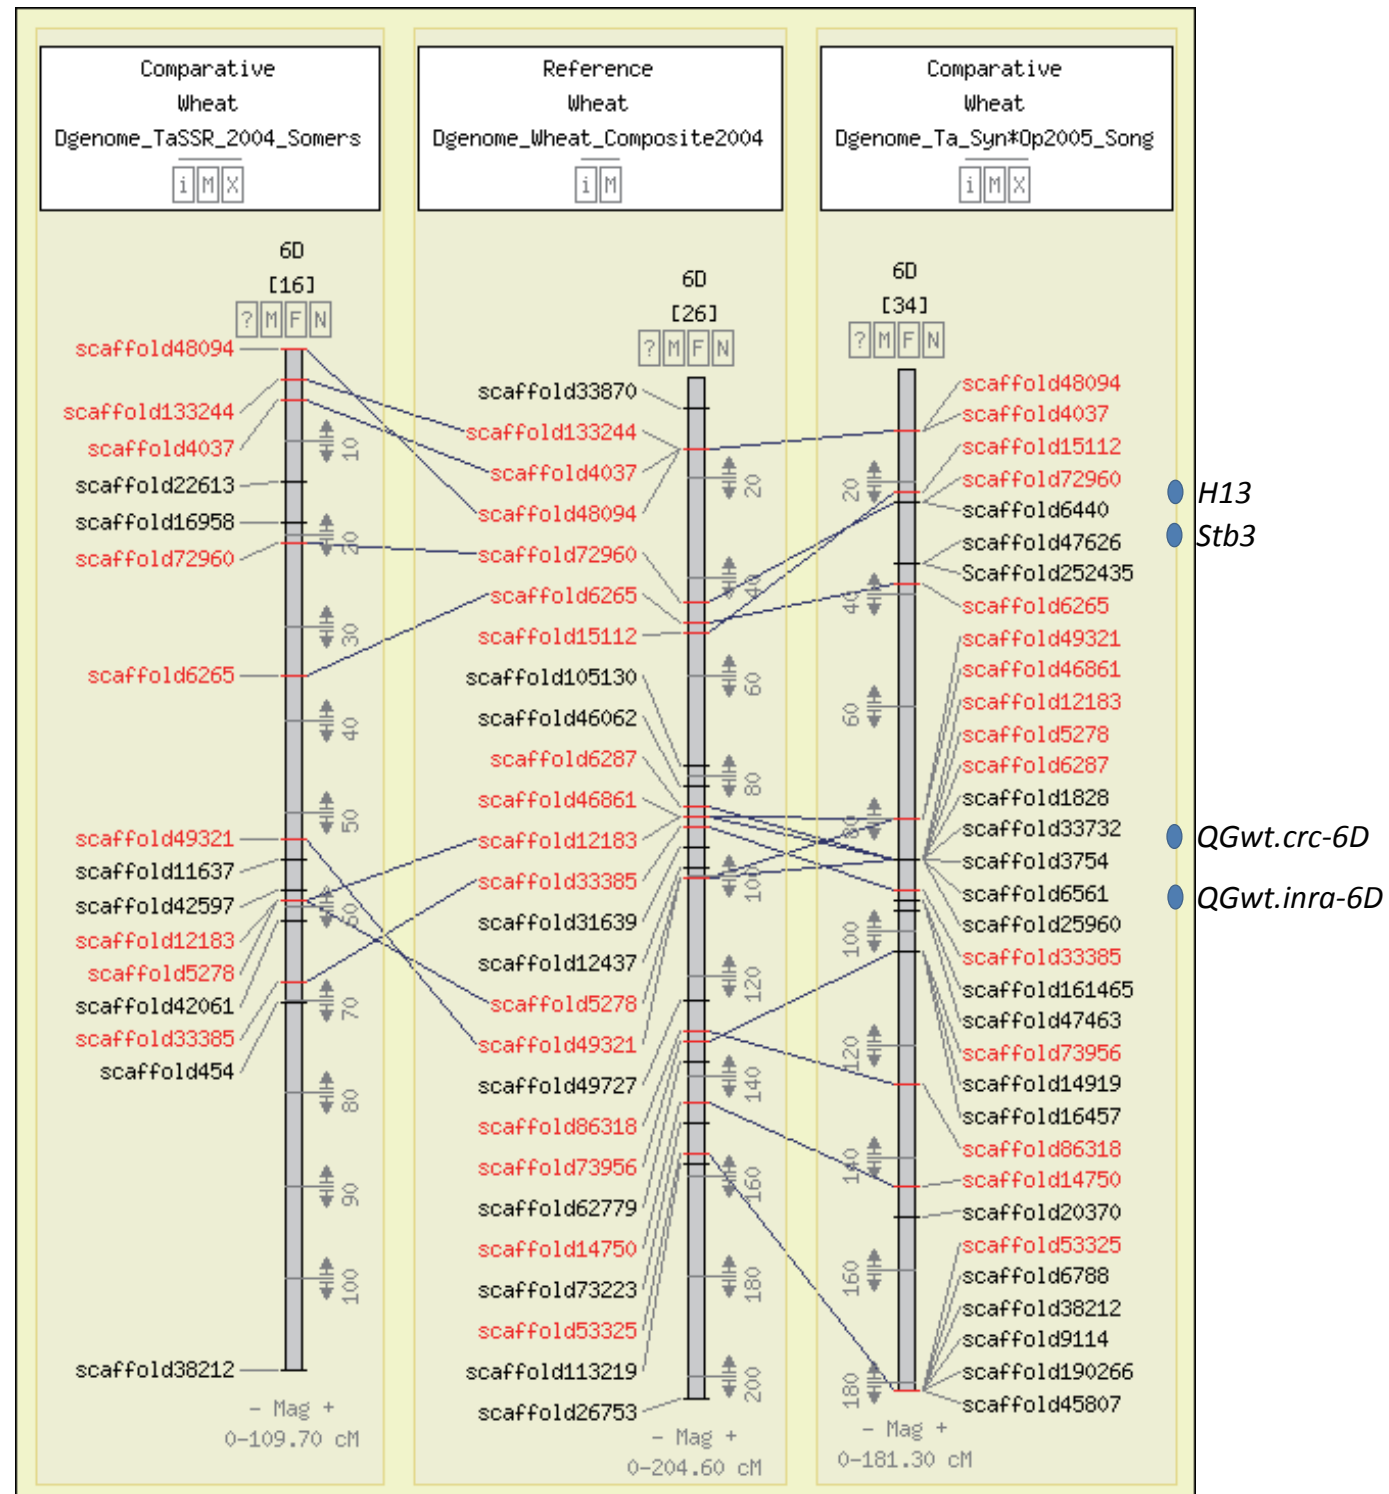

Comparative  
Wheat  
Dgenome\_TaSSR\_2004\_Somers  
i M X

Reference  
Wheat  
Dgenome\_Wheat\_Composite2004  
i M

Comparative  
Wheat  
Dgenome\_Ta\_Syn\*Op2005\_Song  
i M X

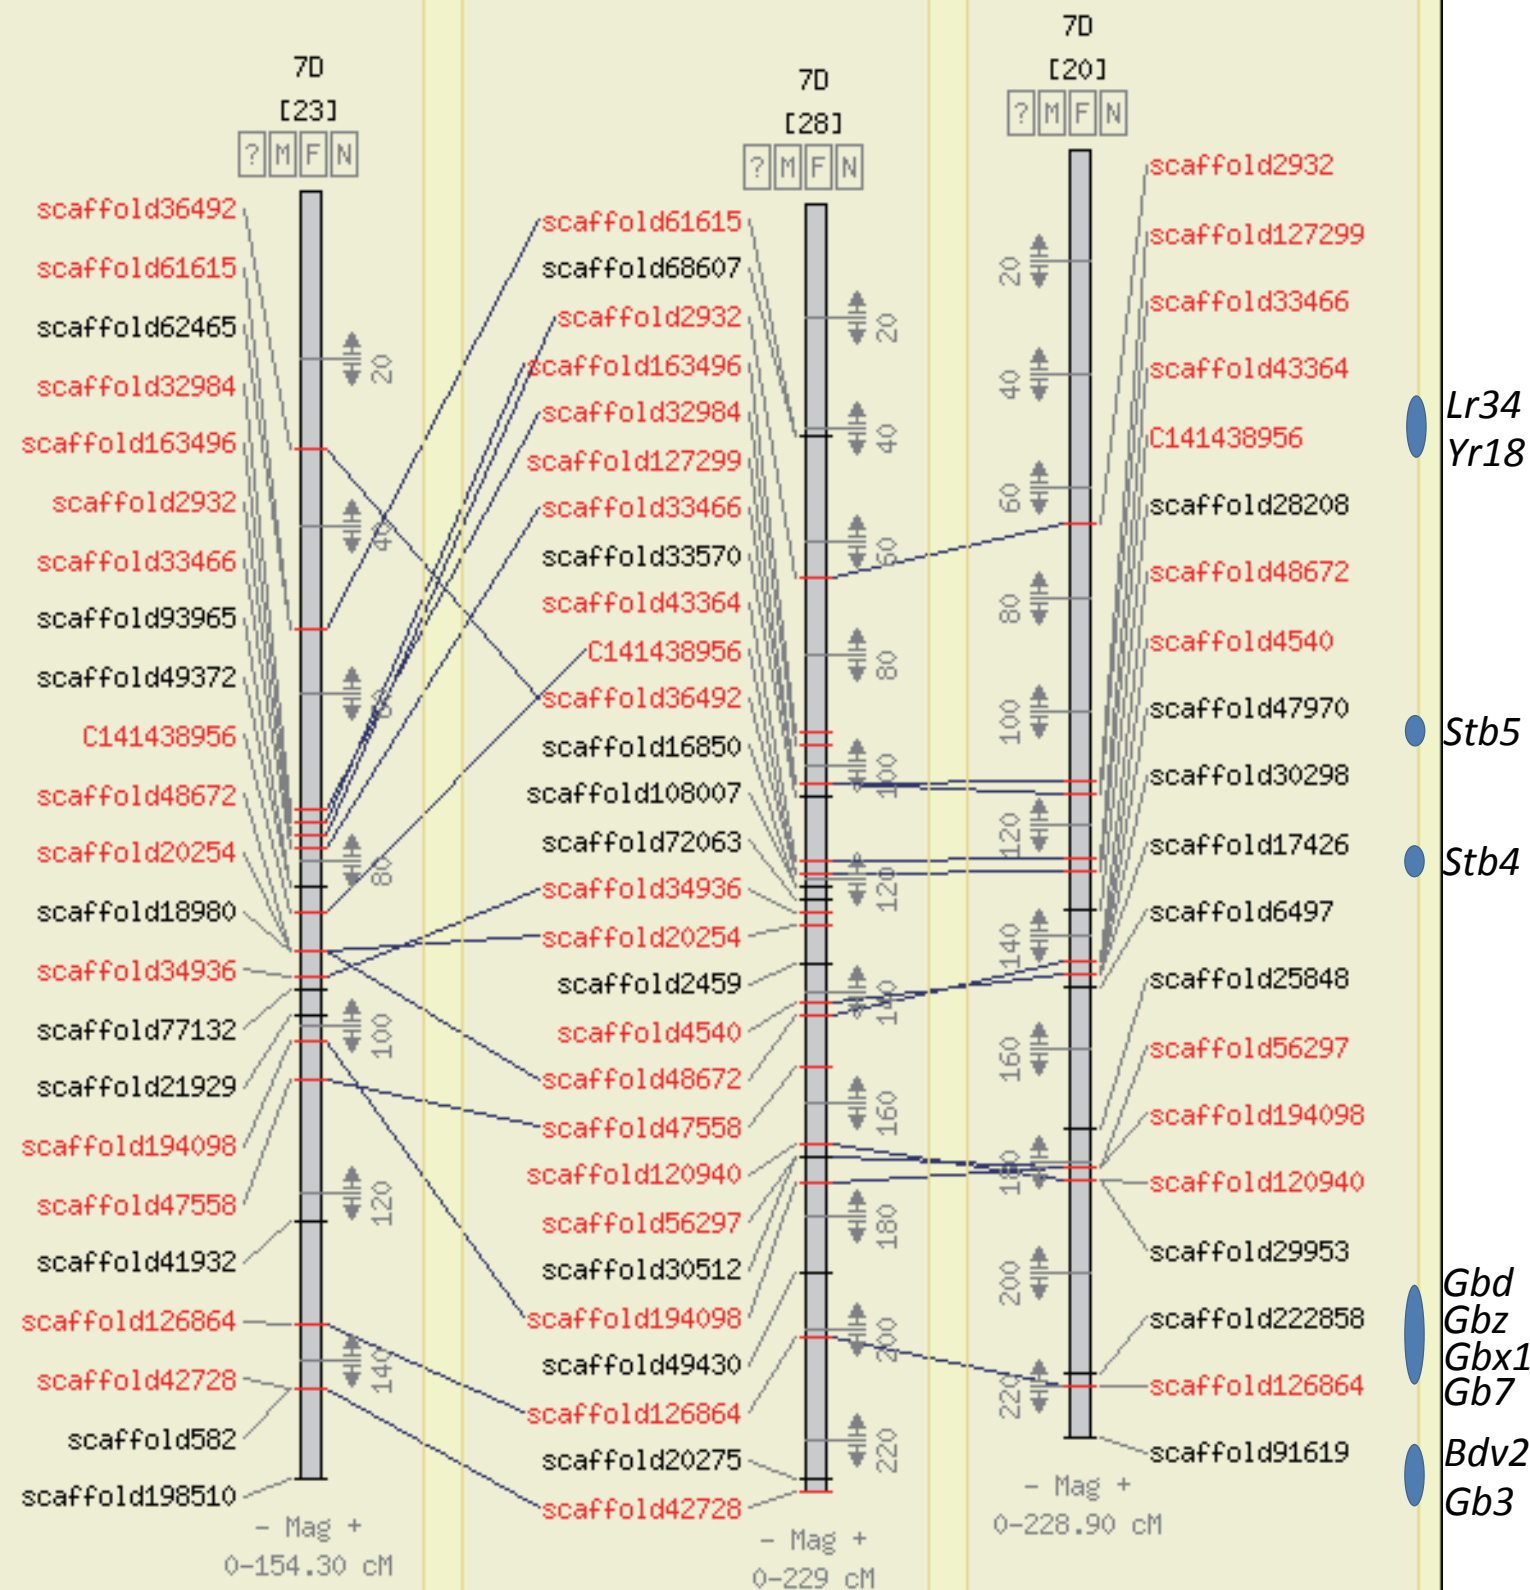

Supplement: 41586_2013_BFnature12028_MOESM78_ESM.pdf [file 41586_2013_BFnature12028_MOESM78_ESM.pdf]
