# Supplementary material for: Aegilops tauschii draft genome sequence reveals a gene repertoire for wheat adaptation
Source: Springer Nature journal article supplement (doi:10.1038/nature12028), 2013-03-22

Supplementary Figure 15: CMap based comparisons of three SNP-based maps.

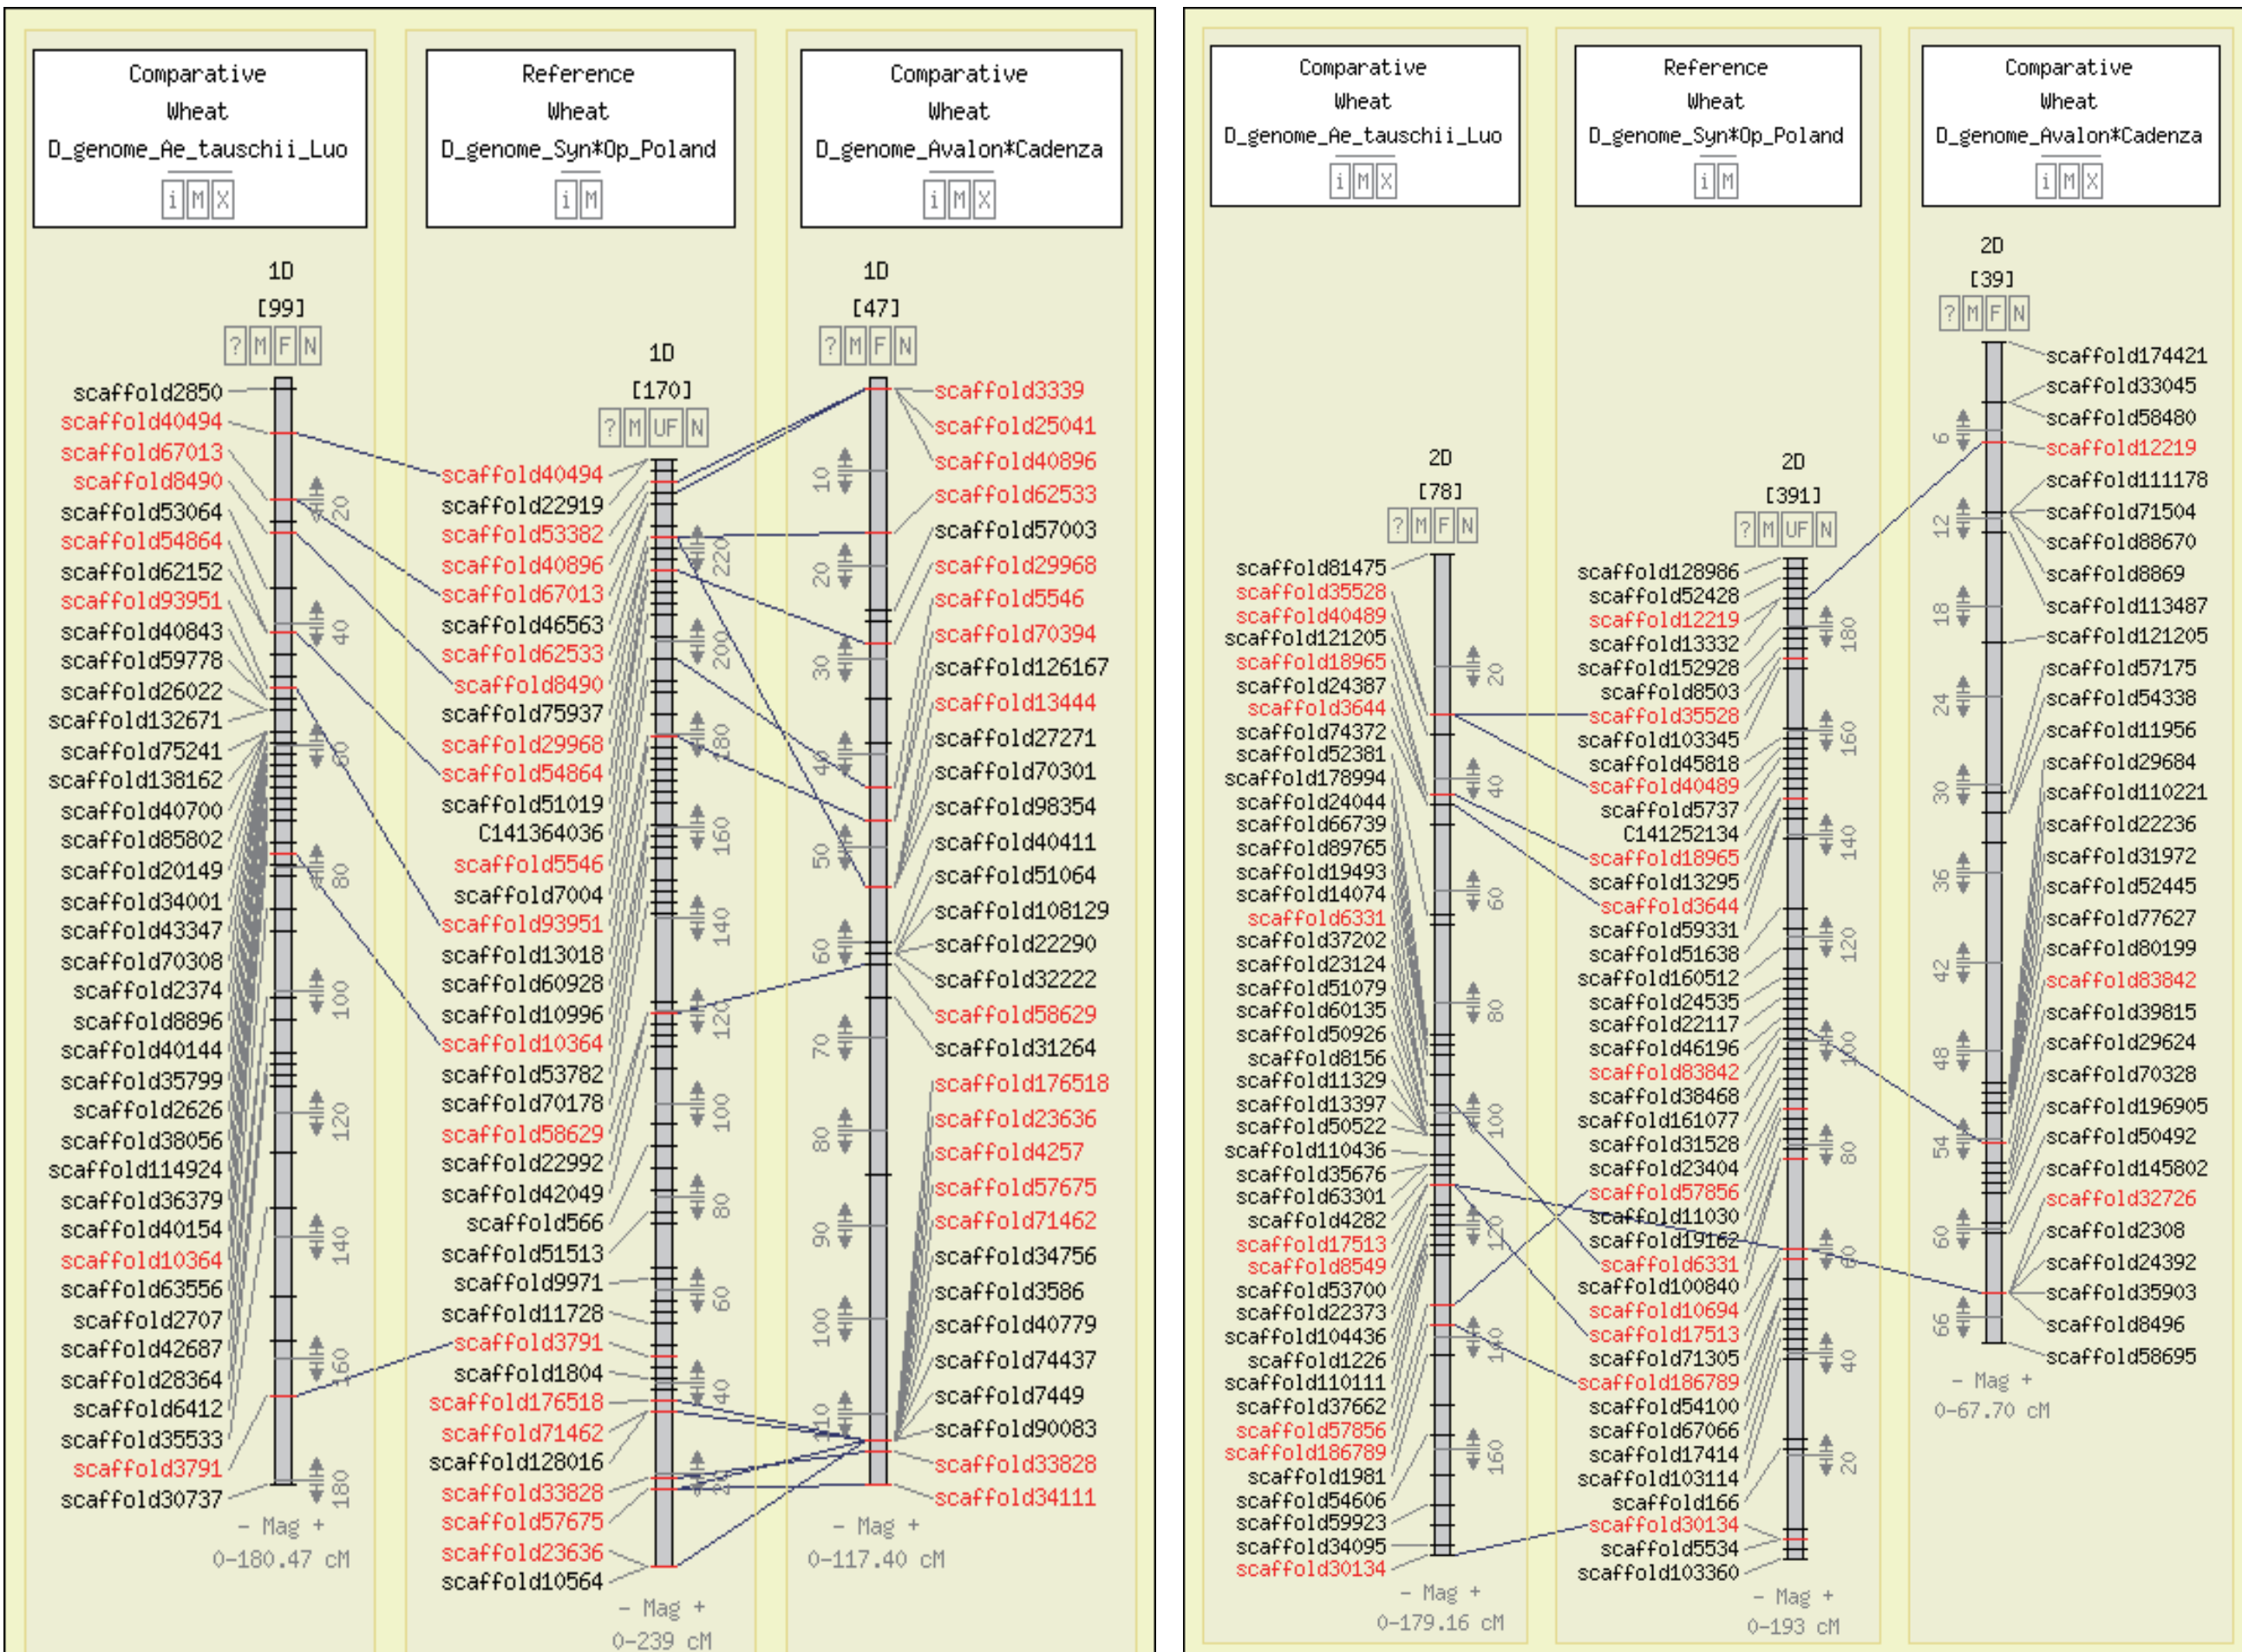

Comparative  
Wheat  
D\_genome\_Ae\_tauschii\_Luo  
[i M X]

Reference  
Wheat  
D\_genome\_Syn\*Op\_Poland  
[i M]

Comparative  
Wheat  
D\_genome\_Avalon\*Cadenza  
[i M X]

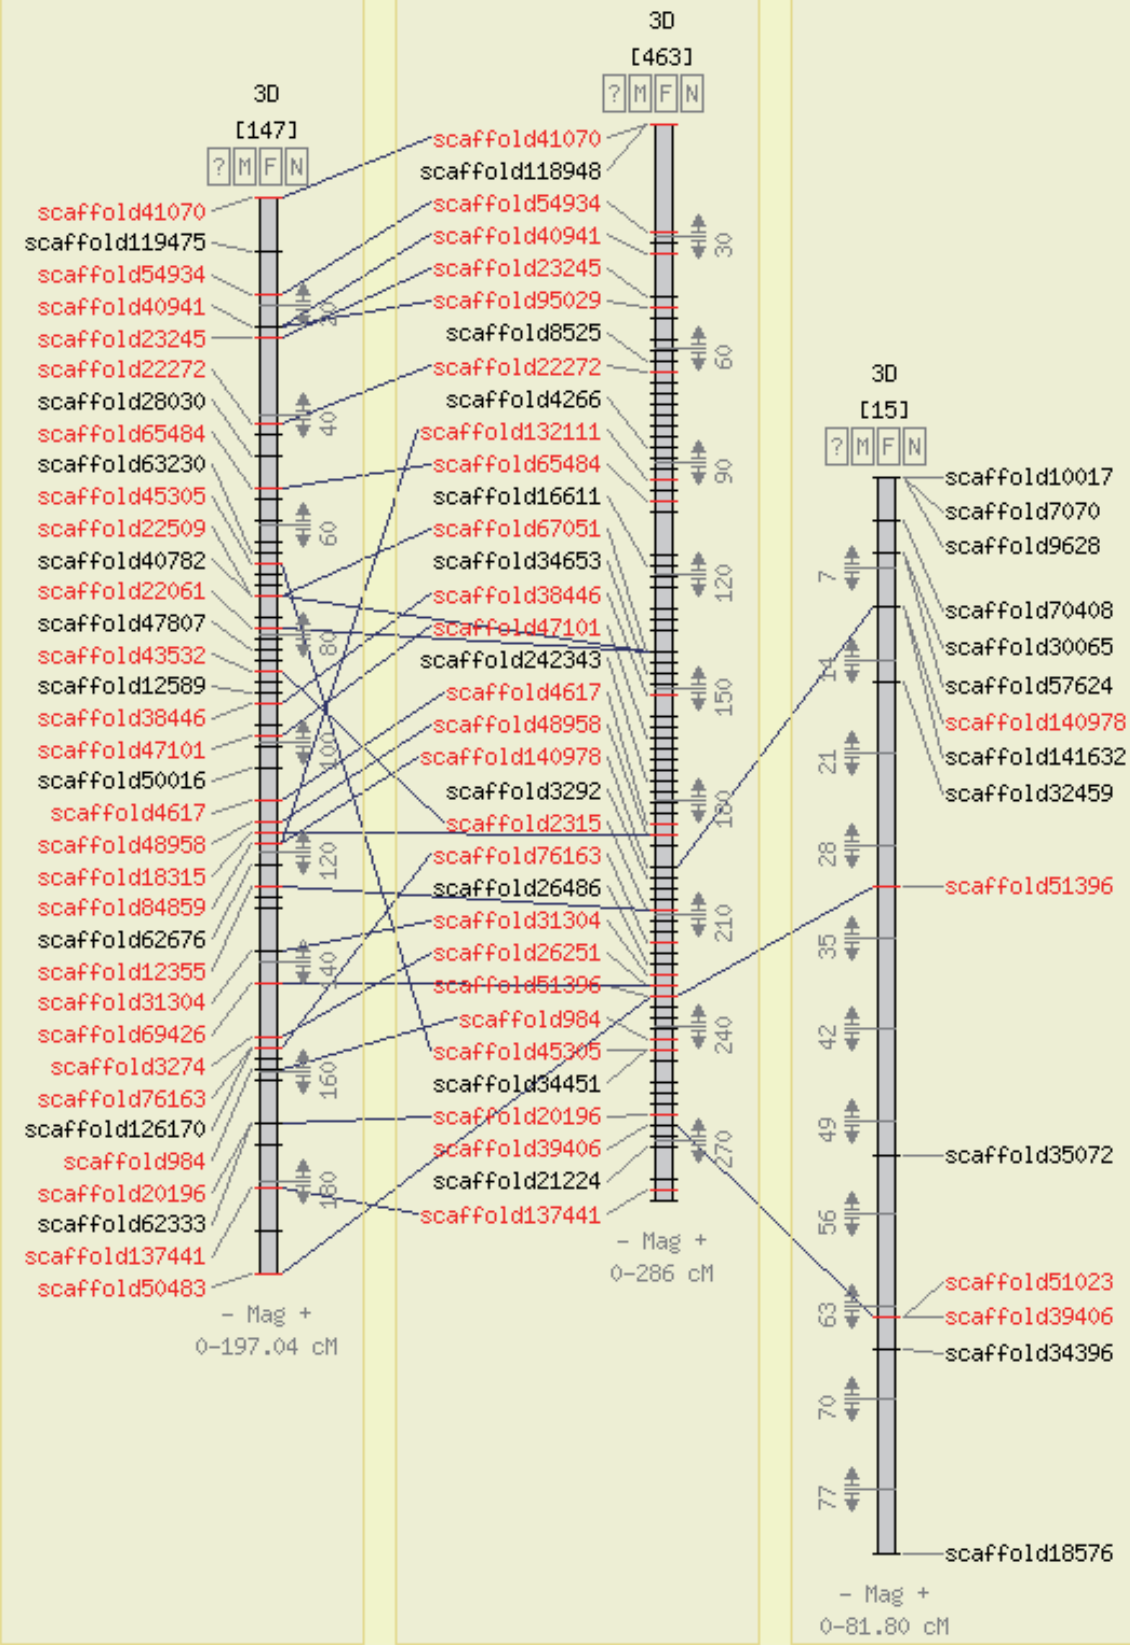

Comparative  
Wheat  
D\_genome\_Ae\_tauschii\_Luo  
[i M X]

Reference  
Wheat  
D\_genome\_Syn\*Op\_Poland  
[i M]

Comparative  
Wheat  
D\_genome\_Westonia\*Kauz  
[i M X]

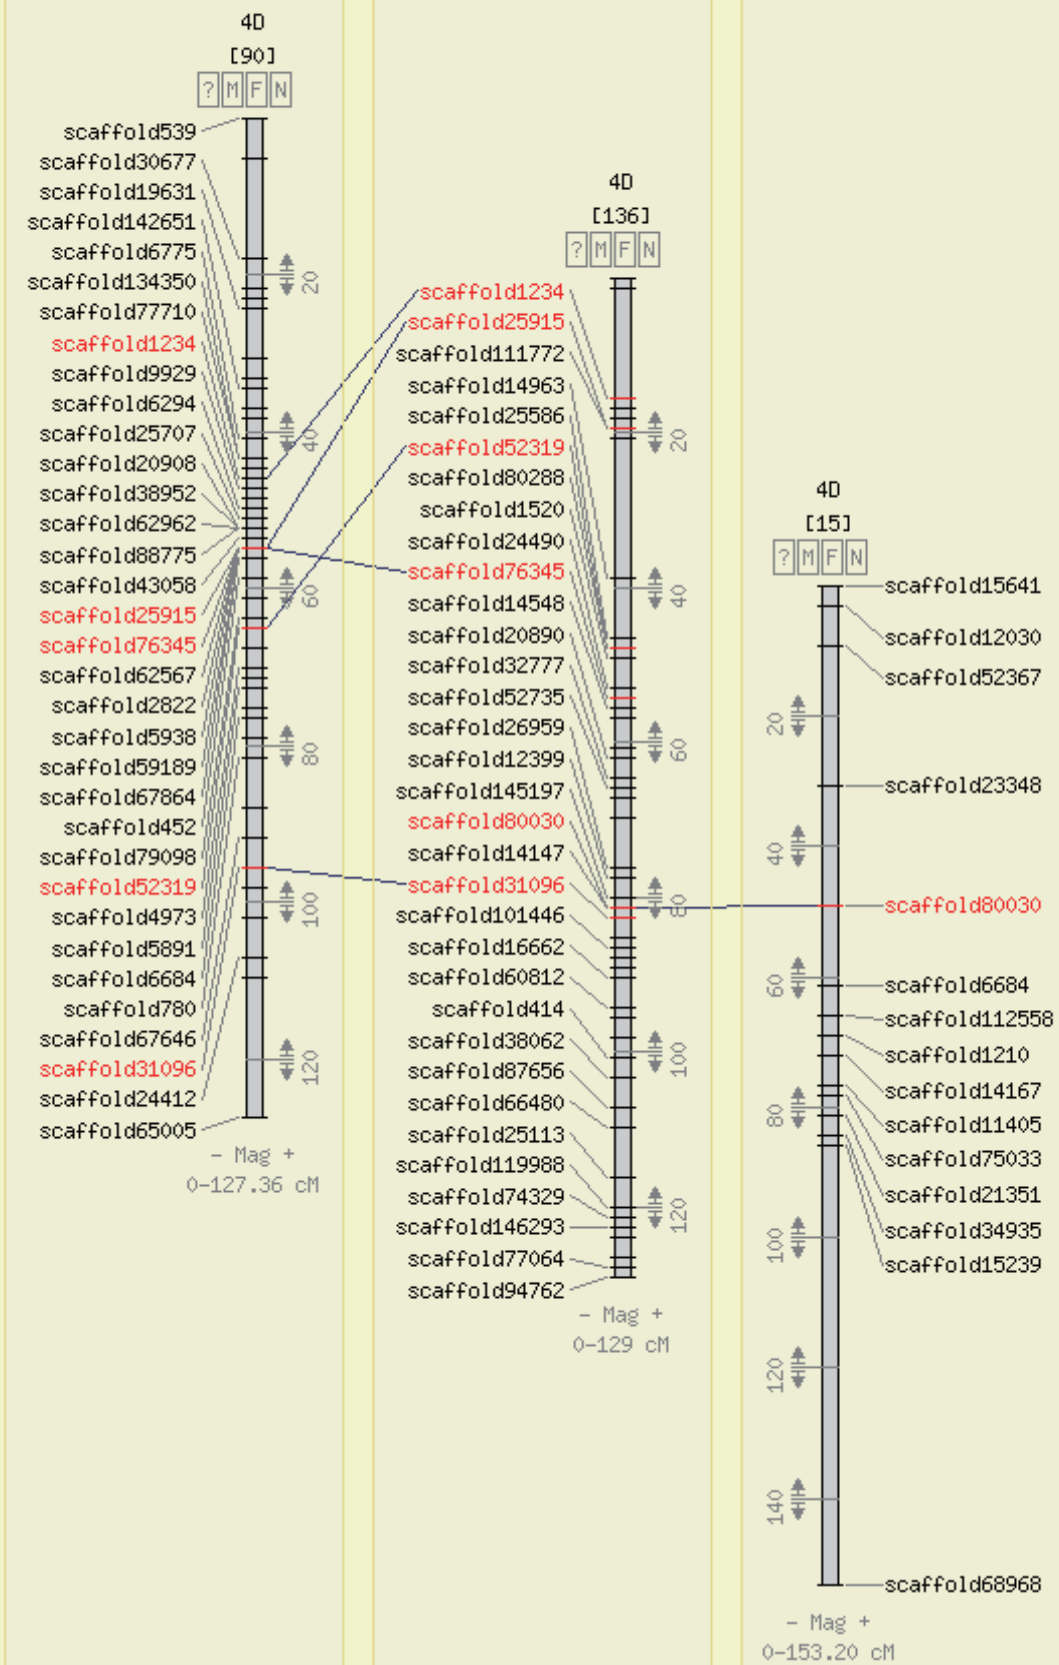

Comparative  
Wheat  
D\_genome\_Ae\_tauschii\_Luo  
i M X

Reference  
Wheat  
D\_genome\_Syn\*Op\_Poland  
i M

Comparative  
Wheat  
D\_genome\_Avalon\*Cadenza  
i M X

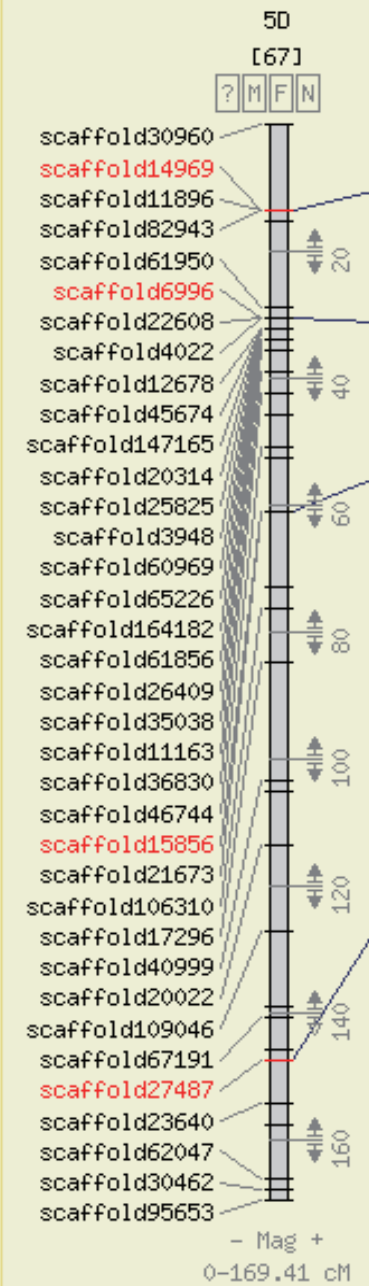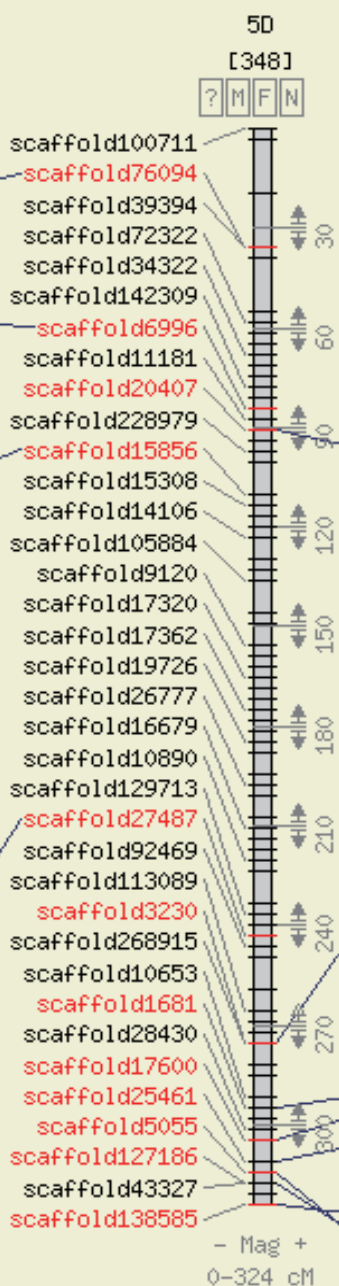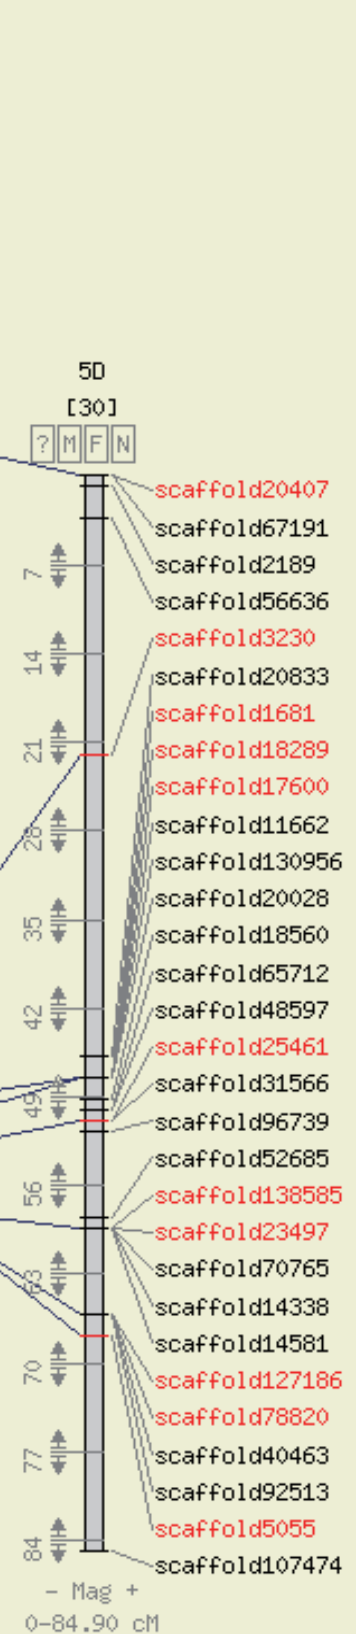

Comparative  
Wheat  
D\_genome\_Ae\_tauschii\_Luo  
i M X

Reference  
Wheat  
D\_genome\_Syn\*Op\_Poland  
i M

Comparative  
Wheat  
D\_genome\_Avalon\*Cadenza  
i M X

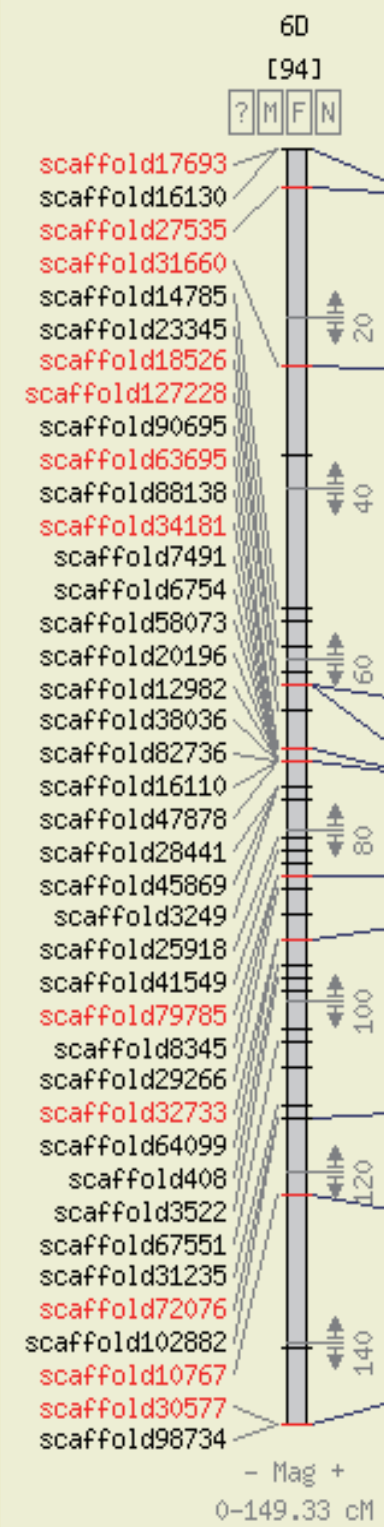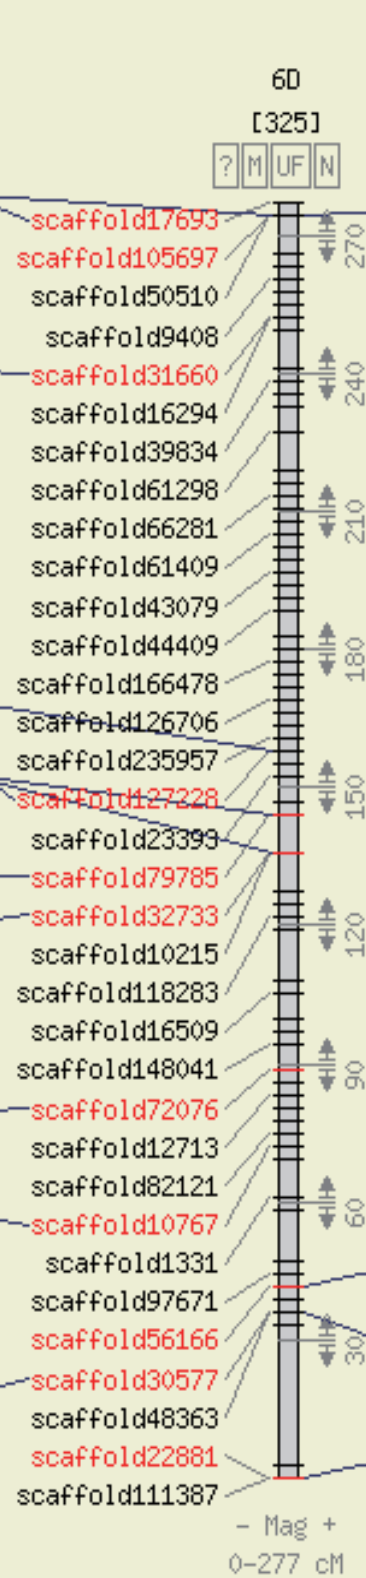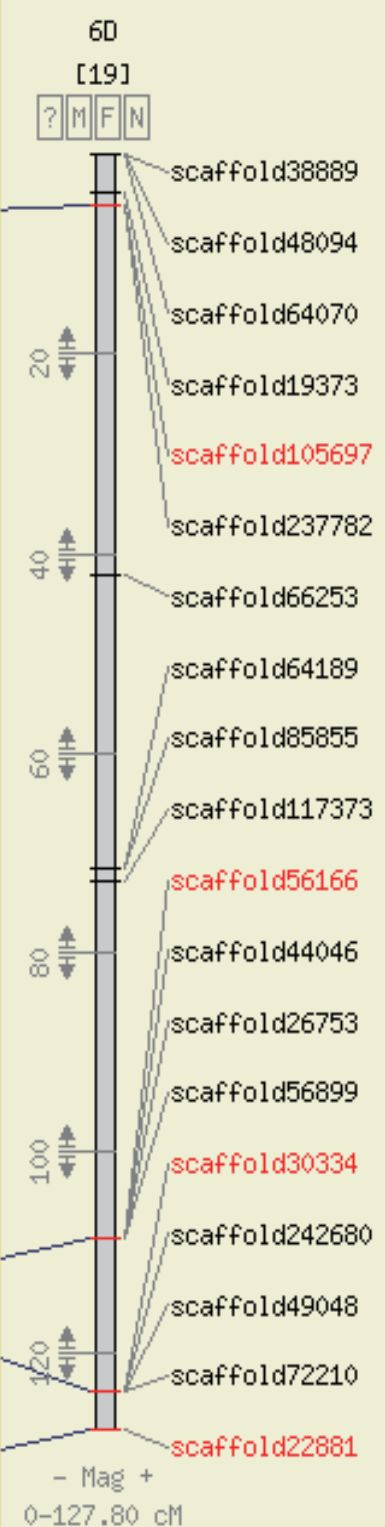

Comparative  
Wheat  
D\_genome\_Ae\_tauschii\_Luo  
i M X

Reference  
Wheat  
D\_genome\_Syn\*Op\_Poland  
i M

Comparative  
Wheat  
D\_genome\_Avalon\*Cadenza  
i M X

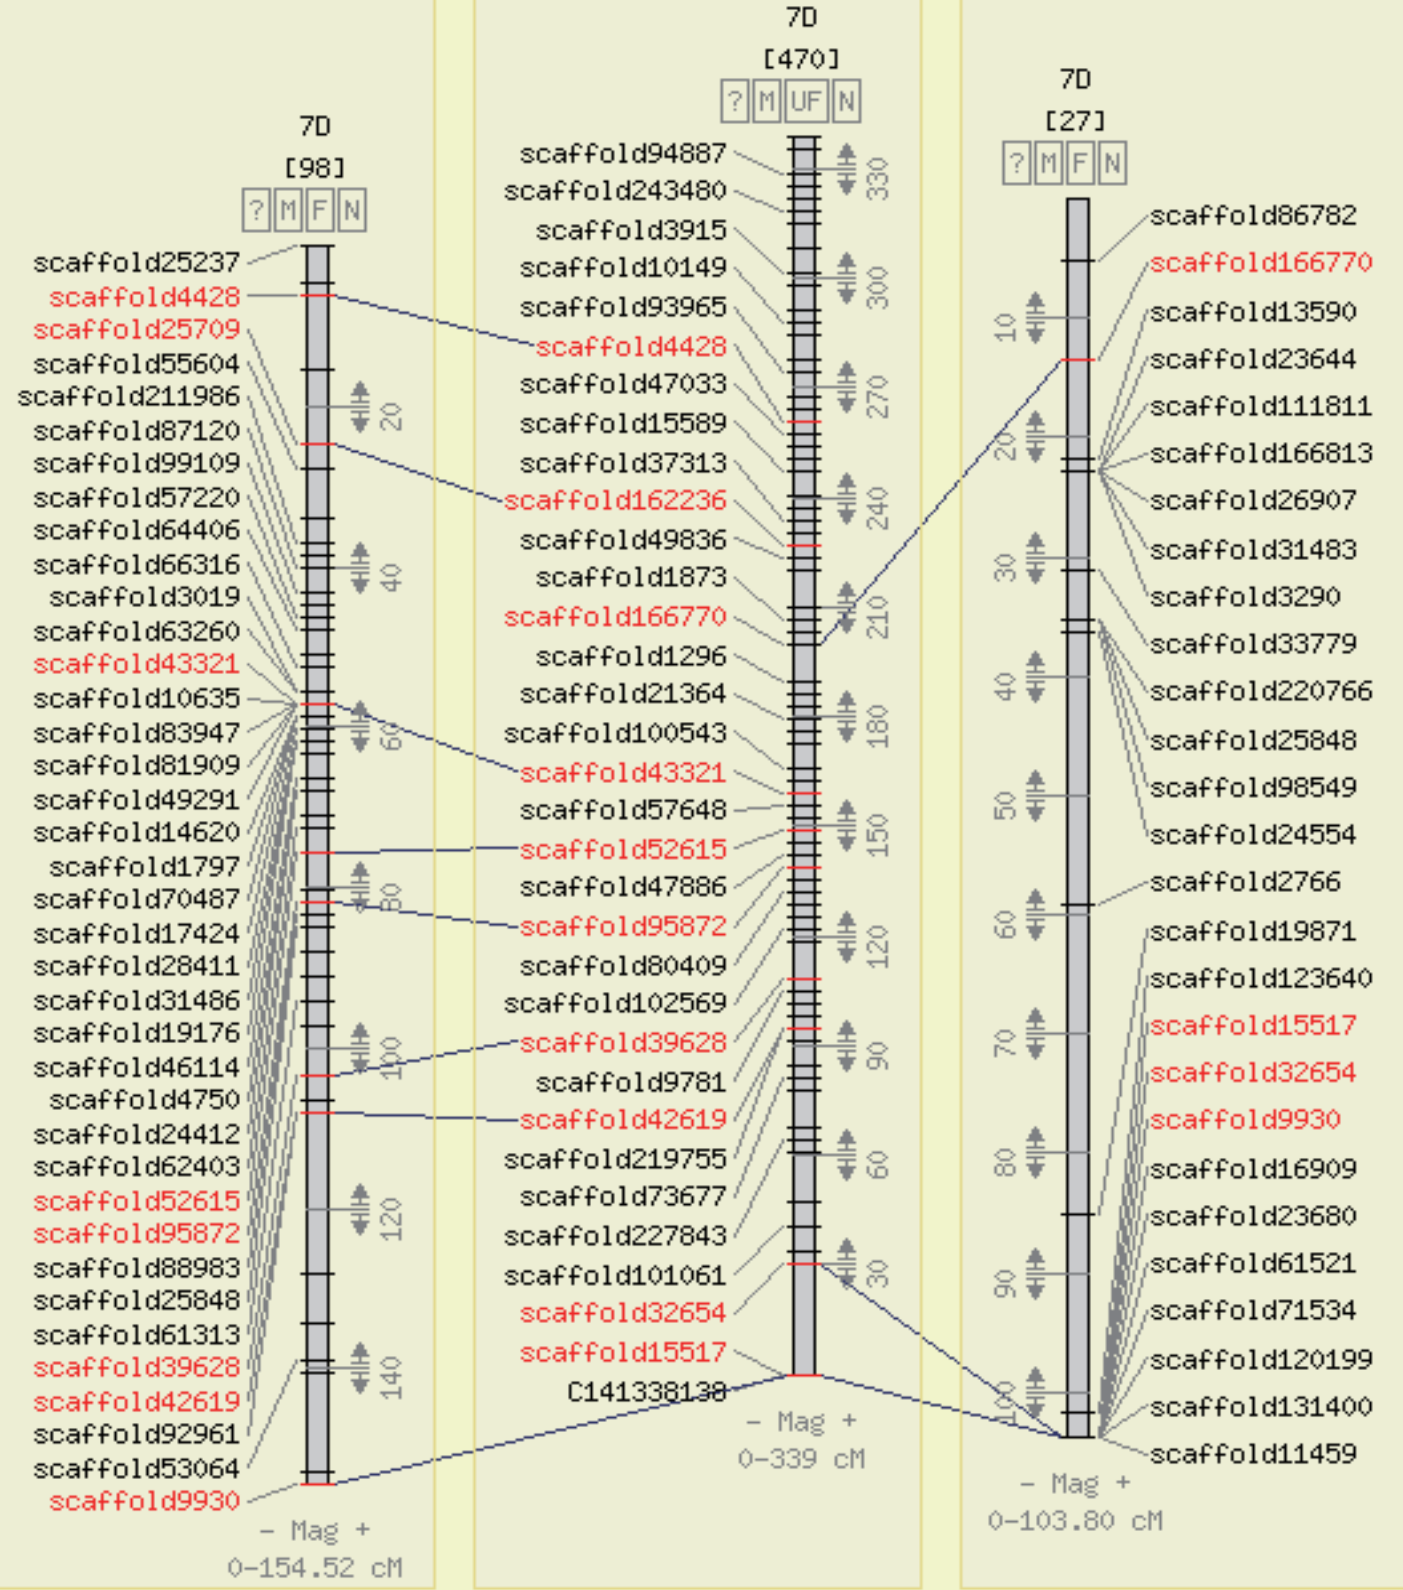

Supplement: 41586_2013_BFnature12028_MOESM79_ESM.pdf [file 41586_2013_BFnature12028_MOESM79_ESM.pdf]
