# Supplementary figures and images for: Aegilops tauschii draft genome sequence reveals a gene repertoire for wheat adaptation
Source: Springer Nature journal article supplement (doi:10.1038/nature12028), 2013-03-22

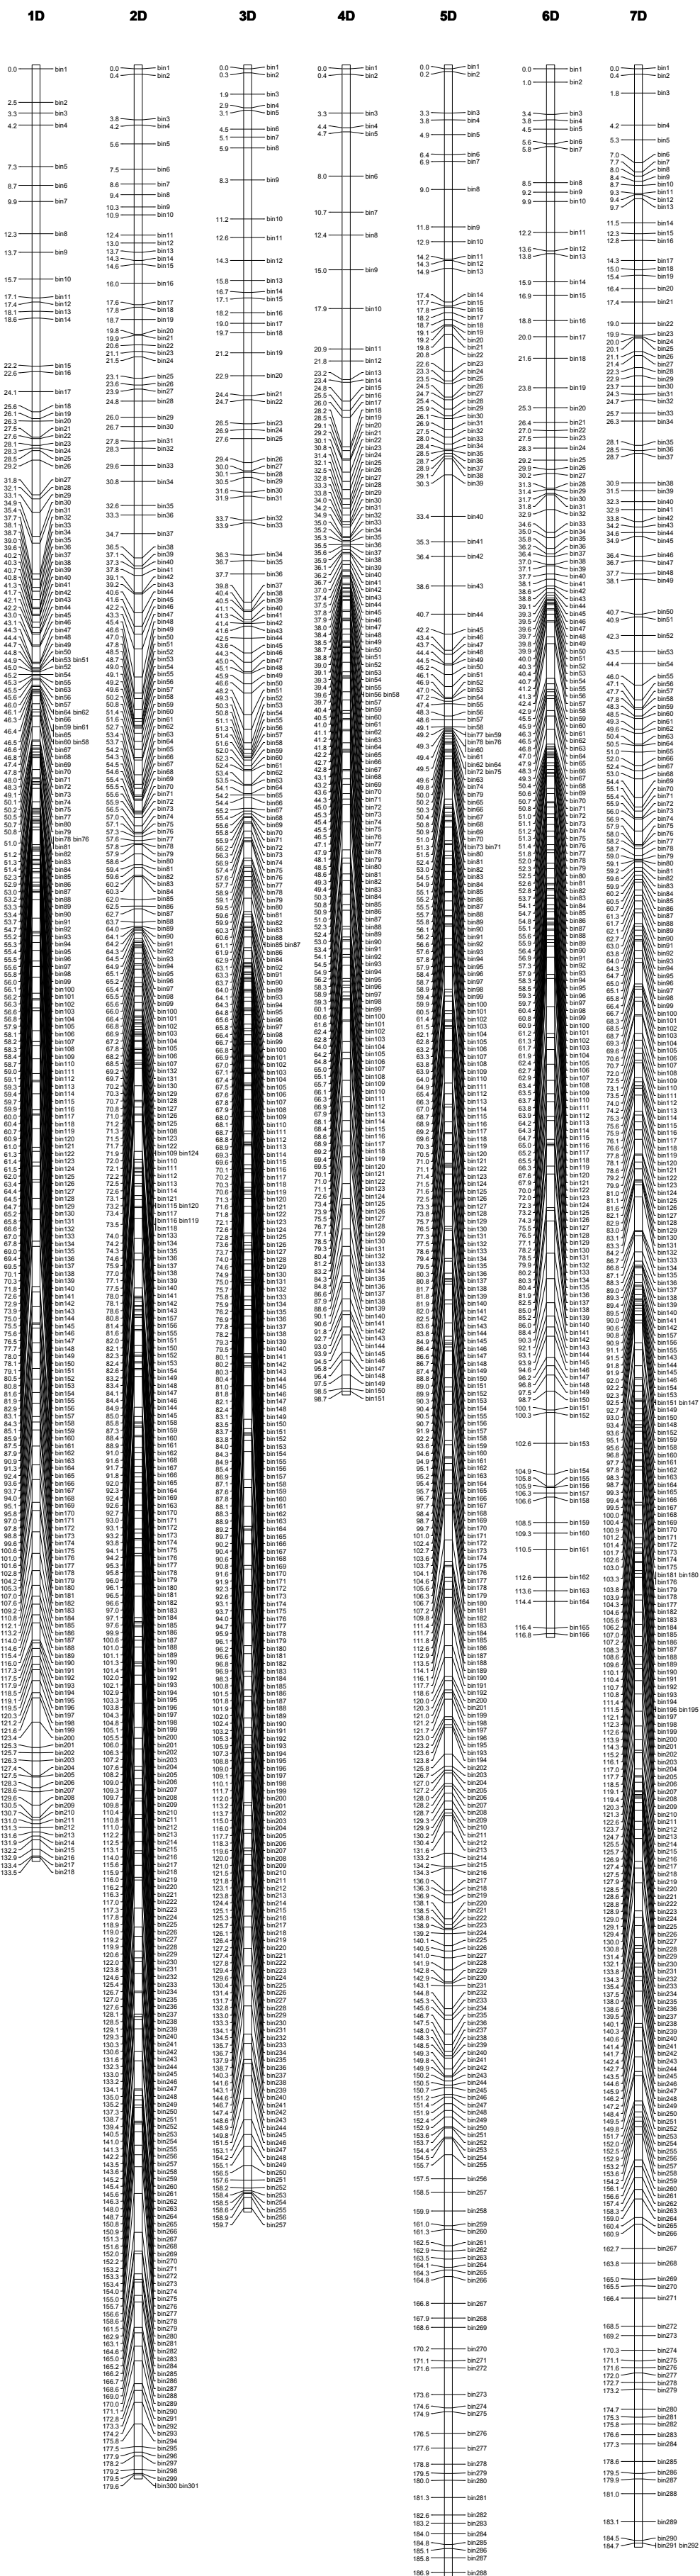

Supplementary Figure 13: The genetic map constructed using RAD tag sequencing technology.

Supplement: 41586_2013_BFnature12028_MOESM77_ESM.pdf [file 41586_2013_BFnature12028_MOESM77_ESM.pdf]
